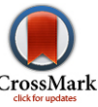

# The Impact of Simvastatin on Pulmonary Effectors of *Pseudomonas aeruginosa* Infection

Emma Hennessy<sup>1</sup>, Julie O'Callaghan<sup>1</sup>, Marlies J. Mooij<sup>1</sup>, Claire Legendre<sup>1</sup>, Olga Camacho-Vanegas<sup>2</sup>, Sandra C. Camacho<sup>2</sup>, Claire Adams<sup>1</sup>, John A. Martignetti<sup>2</sup>, Fergal O'Gara<sup>1,3\*</sup>

**1** BIOMERIT Research Centre, School of Microbiology, National University of Ireland, Cork, Ireland, **2** Department of Genetics and Genomic Sciences, Icahn School of Medicine at Mount Sinai, New York, New York, United States of America, **3** School of Biomedical Sciences, Curtin University, Perth, WA, Australia

## Abstract

The statin family of cholesterol-lowering drugs is known to have pleiotropic properties which include anti-inflammatory and immunomodulatory effects. Statins exert their pleiotropic effects by altering expression of human immune regulators including pro-inflammatory cytokines. Previously we found that statins modulate virulence phenotypes of the human pathogen *Pseudomonas aeruginosa*, and sought to investigate if simvastatin could alter the host response to this organism in lung epithelial cells. Simvastatin increased the expression of the *P. aeruginosa* target genes KLF2, KLF6, IL-8 and CCL20. Furthermore, both simvastatin and *P. aeruginosa* induced alternative splicing of KLF6. The novel effect of simvastatin on wtKLF6 expression was found to be responsible for induction of the KLF6 regulated genes CCL20 and iNOS. Simvastatin also increased the adhesion of *P. aeruginosa* to host cells, without altering invasion or cytotoxicity. This study demonstrated that simvastatin had several novel effects on the pulmonary cellular immune response.

**Citation:** Hennessy E, O'Callaghan J, Mooij MJ, Legendre C, Camacho-Vanegas O, et al. (2014) The Impact of Simvastatin on Pulmonary Effectors of *Pseudomonas aeruginosa* Infection. PLoS ONE 9(7): e102200. doi:10.1371/journal.pone.0102200

**Editor:** Hongwei Gao, Harvard Medical School, United States of America

**Received:** January 14, 2014; **Accepted:** June 16, 2014; **Published:** July 10, 2014

**Copyright:** © 2014 Hennessy et al. This is an open-access article distributed under the terms of the Creative Commons Attribution License, which permits unrestricted use, distribution, and reproduction in any medium, provided the original author and source are credited.

**Funding:** This research was supported in part by grants awarded by the European Commission ([http://ec.europa.eu/index\\_en.htm](http://ec.europa.eu/index_en.htm))(FP7-PEOPLE-2013-ITN, 607786; FP7-KBBE-2012-6, CP-TP-312184; FP7-KBBE-2012-6, 311975; OCEAN 2011-2, 287589; Marie Curie 256596), Science Foundation Ireland ([www.sfi.ie](http://www.sfi.ie))(SSPC-2; 07/IN.1/B948; 12/TIDA/B2411; 12/TIDA/B2405; 09/RFP/BMT2350), the Department of Agriculture and Food ([www.agriculture.gov.ie/](http://www.agriculture.gov.ie/)) (FIRM/RSF/CoFoRD; FIRM 08/RDC/629), the Irish Research Council for Science, Engineering and Technology ([www.research.ie/](http://www.research.ie/)) (PD/2011/2414; RS/2010/2413), the Health Research Board ([www.hrb.ie/](http://www.hrb.ie/))(RP/2006/271; RP/2007/290; HRA/2009/146), the Environmental Protection Agency ([www.epa.ie/](http://www.epa.ie/)) (EPA2006-PhD-S-21; EPA2008-PhD-S-2), the Marine Institute (<https://www.marine.ie/>) (Beaufort award C2CRA 2007/082) Teagasc ([www.teagasc.ie/](http://www.teagasc.ie/)) (Walsh Fellowship 2013), the Higher Education Authority of Ireland ([www.heai.ie/](http://www.heai.ie/))(PRTL14) and the Society For General Microbiology President's Fund for Research Visits ([www.sgm.ac.uk/](http://www.sgm.ac.uk/)). The funders had no role in study design, data collection and analysis, decision to publish, or preparation of the manuscript.

**Competing Interests:** The authors have declared that no competing interests exist.

\* Email: f.ogara@ucc.ie

## Introduction

Statins are a class of drug of which the major medical use is the inhibition of cholesterol biosynthesis. However, statins also have cholesterol-independent pleiotropic effects, including the modulation of genes involved in the immune and inflammatory responses, which in turn lead to overall protective effects against infections and cancer [1–3]. In particular, statins are known to have protective effects against bacterial infections. It has previously been demonstrated that statins improved survival in patients who had sepsis and pneumonia [1,4–6].

One key effect of statin treatment is the inhibition of inflammatory pathways. For instance, statins reduced activation of the pro-inflammatory cytokine Interleukin-8 (IL-8) by bacterial and fungal surface antigens in *ex vivo* blood cells [7]. Production of another infection-induced chemokine, Chemokine (C-C motif) ligand 20 (CCL20; also known as macrophage-inhibitory protein 3 $\alpha$  (MIP-3 $\alpha$ )), was also reduced by statin treatment of keratinocytes [8]. As well as inhibiting pro-inflammatory components, statins also increase the expression of anti-inflammatory components, such as endothelial nitric oxide synthase (eNOS) [9] and thrombomodulin [10]. The anti-inflammatory and immunomodulatory effects of statins are mediated through the alteration of expression of transcription factors such as NF $\kappa$ B [11]. Interestingly, despite the fact that the majority of studies involving statins

and inflammation describe an anti-inflammatory effect, several studies have reported pro-inflammatory effects of statins [12–15].

One group of transcriptional regulators that is now emerging as both a key group of immune and inflammatory regulators and a target of statin treatment is the Kruppel-like Factors (KLFs). These are a family of transcriptional regulators characterised by the presence of 3 conserved zinc fingers [16]. We have previously found 2 KLF family members, KLF2 and KLF6, to be increased in an *in vitro* *Pseudomonas aeruginosa* infection model [17]. *P. aeruginosa* is an important human pathogen that causes serious infections in immunocompromised individuals and is the main pathogen associated with chronic refractory pulmonary infections in cystic fibrosis (CF) patients. The pathogenesis of *P. aeruginosa* can be attributed to a plethora of virulence associated phenotypes including the production and secretion of toxins via the Type 3 secretion system (T3SS). Previously we have shown that the exotoxins ExoS and ExoY secreted by the T3SS are required for *P. aeruginosa* induction of KLF2 and KLF6 in CF airway epithelial cells [17]. KLF2 is mainly characterised as an anti-inflammatory regulator which can control the activation of monocytes and macrophages [18,19], and has been found to be induced by toxin activity of *Staphylococcus aureus* [20], *Yersinia enterocolitica* [21] and *Clostridium botulinum* [22]. Furthermore, statins can also induce the expression of KLF2 [22,23].

**Table 1.** Cells and bacteria used in this study.

|                                    | Type                                | Source     |
|------------------------------------|-------------------------------------|------------|
| <b>Mammalian cell line</b>         |                                     |            |
| A549                               | Wild type squamous lung epithelia   | ATCC       |
| A549 pSUPER-wtKLF6                 | si-RNA-mediated knockdown of wtKLF6 | This study |
| A549 pSUPER-Retro-luc              | Vector Control                      | This study |
| <b>Bacteria</b>                    |                                     |            |
| <i>Pseudomonas aeruginosa</i> PAO1 | Wild type                           | [65]       |

doi:10.1371/journal.pone.0102200.t001

The role of KLF6 in infections is currently less clear than that of KLF2. KLF6 is most widely-recognised as a tumour suppressor protein which inhibits proliferation [24], and induces apoptosis [25]. However, KLF6 is known to be alternatively spliced into a full-length transcript (wtKLF6) and 3 truncated variants (SV1, SV2, SV3) [26]. In contrast to the tumour suppressive action of wtKLF6, the splice variants of KLF6, particularly SV1, have been found to have oncogenic properties and have been implicated in several types of cancer including lung, liver, ovarian and prostate [26–29]. Given that they do not possess the 3 zinc fingers of wtKLF6 it is believed the splice variants cannot exert their biological effects through direct binding of DNA but instead must interact with other proteins [30]. For example, SV1 has been shown to bind directly to wtKLF6 accelerating its degradation and thus antagonising its tumour suppressor function [31].

While to date, it has not been characterised, it is likely that KLF6 does play a role in bacterial infections, as it is upregulated by *S. aureus* [20] and *P. aeruginosa* [17], and can promote the apoptosis of cells infected with respiratory syncytial virus [32] and influenza A [33]. Furthermore, some regulatory targets of KLF6 are known to have roles in the immune response to infections. KLF6 directly activates promoter expression of ASAH1 (acid ceramidase) [34] and iNOS (inducible nitric oxide synthase; NOS2) [35], two proteins that regulate the production of signalling molecules with roles in the inflammatory response. ASAH1 regulates the production of ceramide, which is upregulated as part of the host response to *P. aeruginosa* [36], leading to increased inflammation [37]. iNOS is responsible for the production of nitric oxide (NO), a signalling molecule which is responsible for increased inflammation, lung damage and bacterial killing during infections [38,39]. In addition, KLF6 also induces the expression of the pro-inflammatory chemokine CCL20 (MIP-3 $\alpha$ ). It has been proposed that this effect is indirect, mediated through the KLF6-dependent inhibition of another transcription factor called Peroxisome Proliferator-Activated Receptor  $\gamma$  (PPAR $\gamma$ ) in kidney cells [40].

In this study, we sought to investigate the effect of simvastatin on the expression of *P. aeruginosa*-responsive immune modulators, including KLF6 splice variants, in a lung epithelial cell model. In addition to KLF2 and KLF6, *P. aeruginosa* has been shown to alter the expression of several modulators of the host immune response including IL-8 [41], CCL20 [42] and TLR5 (Toll-like Receptor 5) [43], which activates NF $\kappa$ B-dependent inflammation in response to bacterial cell surface component flagellin [44,45]. We demonstrate that simvastatin induces pro-inflammatory modulators of the immune response and that both *P. aeruginosa* and simvastatin induce KLF6 splice variants in A549 epithelial cells, with the wtKLF6 being the dominant variant. Thus, we observed that simvastatin could alter the genetic and physiological immune

response in lung cells and KLF6 was identified as a novel target of statins and an important transcriptional regulator in the lung.

## Materials and Methods

### Mammalian cells and bacterial strains

All cell lines and bacterial strains used in this study are detailed in Table 1. A549 cells (ATCC) were grown in minimal Eagle's medium (MEM) (Sigma-Aldrich, U.K.) supplemented with 10% FBS, 50 units/ml pen-strep and 2 mM L-glutamine. Infection assays were carried out using co-culture medium (MEM minus pen-strep), and cells that were used for determination of cytotoxicity were cultured in serum-free MEM. All media components were obtained from Gibco unless stated otherwise. Cells were incubated at 37 °C in a humidified 5% CO<sub>2</sub> atmosphere. *P. aeruginosa* was cultured in Luria-Bertani (LB) broth (10 g/L tryptone, 5 g/L yeast extract, 5 g/L NaCl) and were subcultured for infection assays in co-culture medium.

### Generation of stable cell lines for knockdown of wtKLF6

Stable cell lines were generated by retroviral infection of A549 cells with a pSUPER retroviral vector containing either siRNA specifically designed against wtKLF6 (pSUPER si-wtKLF6) or luciferase as control (pSUPER-luc). These retroviral vectors have been previously described [46]. For standard infection, approximately  $1 \times 10^6$  viral particles were incubated with  $4.8 \times 10^5$  A549 cells in a final volume of 6 ml in the presence of 10  $\mu$ g/ml polybrene (Sigma) for 3 successive 12 hour periods. Infected cells were selected using 0.5  $\mu$ g/ml puromycin (Sigma) and used for subsequent analysis.

### Statin treatment and infection of cells

Simvastatin (Sigma-Aldrich) was resuspended in DMSO at a concentration of 20 mg/ml, filter sterilised and stored at 4 °C. Cells were trypsinised, counted and seeded into plastic vessels. Cells were then incubated until they achieved 80% confluency following which they were treated with either 10  $\mu$ M simvastatin or an equivalent volume of DMSO for 24 hours. Bacterial strains were cultured shaking at 37 °C at 16–18 hours in LB broth, following which they were sub-cultured in infection medium shaking at 37 °C for 3 hours. Bacterial strains were centrifuged (2900  $\times$  g) and washed twice with phosphate-buffered saline (PBS), following which bacterial densities were adjusted so as to infect cells at a multiplicity of infection (MOI) of approximately 50:1.

### RNA isolation and quantitative real-time PCR (qRT-PCR)

RNA was isolated using an RNeasy mini kit (QIAGEN, Germany) according to manufacturer's specifications, and was quantified using a ND-1000 Spectrophotometer (NanoDrop

Technologies, USA). Genomic DNA was removed using Turbo DNA-free (Ambion), and samples were confirmed to be free of DNA by PCR. RNA was converted to cDNA using oligo-d(T) and AMV reverse transcriptase (both Promega) according to manufacturer's instructions. qRT-PCR was carried out using the Universal ProbeLibrary (UPL) system (Roche) according to manufacturer's specifications, and samples were normalised to hypoxanthine phosphoribosyltransferase (HPRT). A full list of the primers and UPL probes used in this study is detailed in Table 2.

**Determination of cytotoxicity**

Cytotoxicity of statin treatment and *P. aeruginosa* infection was measured using a LDH Cytotoxicity Detection Kit (Roche) according to manufacturer's instructions. Infection and statin-treatment of A549 cells were set up as previously described, except that in this instance serum-free medium was used for infection as FBS caused high background levels of LDH activity. The OD<sub>492nm</sub> of samples was measured using a SpectraMax Plus 384 96 well plate reader. Five independent biological replicates of each experiment were carried out.

**Measurement of bacterial adhesion and invasion**

Adhesion and invasion of bacteria were quantified as described by Burns *et al.* [47]. Briefly, A549 cells were treated with simvastatin and infected with *P. aeruginosa* PAO1 as previously described. For determination of invasion, after 1 hour of infection ceftazidime (1 mg/ml) and gentamicin (2 mg/ml) (both Sigma-Aldrich) were added for a further 2 hours, following which cells were washed twice with PBS and lysed using 0.1% Triton X-100.

Intracellular bacteria were enumerated by serial dilutions and plate counts. To measure bacterial adherence, extracellular bacteria were removed from epithelial cells, which were lysed to provide a total and intracellular count following 3 hours of infection. The adherent count was determined by subtracting the number of intracellular and extracellular bacteria from the total bacterial count. Five independent biological replicates were performed for each experiment.

**Statistical analysis**

Three independent biological replicates were performed for each experiment unless otherwise stated. Statistical significance was measured using a paired two-tailed Student's T-test. Differences were considered to be statistically significant if the p-value was ≤0.05.

**Results**

**Simvastatin alters the gene expression of *P. aeruginosa*-responsive host immune modulators**

In order to investigate the effect of statins on the expression of infection-responsive, immunomodulatory genes, 5 genes previously shown to be induced during *P. aeruginosa* infection were selected for analysis; KLF2, KLF6, IL-8, TLR5 and CCL20 [13,37–39]. The expression of these candidate genes was analysed in A549 squamous epithelial lung cells which were treated with 10 μM simvastatin or an equivalent volume of DMSO vehicle control for 24 hours, following which they were infected with *P. aeruginosa* PAO1 at an MOI of 50:1 for 3 hours. Gene expression was

**Table 2.** Primers used for qRT-PCR analysis of host gene expression.

| Gene   | Product Length (bp) | Sequence                         | Probe No. * |
|--------|---------------------|----------------------------------|-------------|
| HPRT   | 102                 | Forward: tgaccttgattattttgcatacc | 73          |
|        |                     | Reverse: cgagcaagacgttcagctct    |             |
| KLF2   | 67                  | Forward: cctccaaactgtgactggt     | 115         |
|        |                     | Reverse: ctctgtagccacgctgtgc     |             |
| wtKLF6 | 70                  | Forward: aaagctcccacttgaaagca    | 2           |
|        |                     | Reverse: cctcccatgagcatctgtaa    |             |
| SV1    | 109                 | Forward: ggcaactccgaaagcaca      | 24          |
|        |                     | Reverse: cctcagaggtgcctcttcat    |             |
| SV2    | 96                  | Forward: gggaacctctcaactgtgg     | 24          |
|        |                     | Reverse: aaggctttctcctggcttc     |             |
| SV3    | 96                  | Forward: acgcacacaggtgttttcc     | 32          |
|        |                     | Reverse: ccttttagcctacaggatccac  |             |
| IL-8   | 77                  | Forward: gccaggatccacaagctct     | 98          |
|        |                     | Reverse: tggggtaataacttttccact   |             |
| CCL20  | 77                  | Forward: tggcttttctggaatggaat    | 117         |
|        |                     | Reverse: tgtcaagtgaacctccaa      |             |
| ASAH1  | 86                  | Forward: ttgacattggggatctggt     | 10          |
|        |                     | Reverse: attcaacaccacgctgaa      |             |
| iNOS   | 68                  | Forward: ttccttacgagcggaagaag    | 3           |
|        |                     | Reverse: tcagagcgtgacatctcc      |             |
| PPARγ  | 78                  | Forward: accagctgaatccagagctcc   | 81          |
|        |                     | Reverse: gcgggaaggactttatgtatga  |             |

\* Roche Universal ProbeLibrary (UPL) Probe Number.

The annealing temperature of all primer sets is 60°C.

doi:10.1371/journal.pone.0102200.t002

analysed using qRT-PCR. Simvastatin has been found to induce KLF2 in endothelial cells & human peripheral blood monocytes [22] and our model complied with these findings. KLF2 was significantly increased in statin-treated A549 cells compared to DMSO-treated cells ( $P=0.012$ ) (Figure 1A). Interestingly, *P. aeruginosa* also significantly induced KLF2 expression ( $P=0.033$ ) but to a much lesser degree than simvastatin alone and there was no additive effect in statin-treated infected cells ( $P=0.008$ ). Previous studies have shown that statins did not have an effect on KLF6 expression [22], however, here we demonstrate a significant induction of wtKLF6 by simvastatin treatment in A549 lung epithelial cells ( $P=0.005$ ) (Figure 1B). *P. aeruginosa* also significantly induced KLF6 ( $P=0.015$ ), but to a greater extent than simvastatin, and this effect was sustained in simvastatin-treated infected cells ( $P=0.0019$ ). Thus, there was also no additive effect of simvastatin and *P. aeruginosa* on wtKLF6 expression.

As expected, *P. aeruginosa* infection substantially induced IL-8 expression; transcript levels in infected cells were over 100 times higher than control cells (Figure 1C). Interestingly, in contrast to published reports [7] we observed that simvastatin increased the expression of IL-8 by 14.75-fold compared to vehicle treated epithelial cells. However, when cells were pre-treated with simvastatin and subsequently infected with *P. aeruginosa*, the level of IL-8 expression was not significantly different to untreated infected cells. CCL20 expression was also significantly increased by *P. aeruginosa* compared to uninfected cells ( $P=0.03$ ) and it was increased to a lesser extent ( $P=0.02$ ) by simvastatin alone compared to vehicle-treated cells (Figure 1D). Interestingly however, in simvastatin-treated infected cells, a significant increase in CCL20 expression was observed ( $P=0.02$ ). This effect was greater than CCL20 induction by simvastatin ( $P=0.02$ ) or *P. aeruginosa* ( $P=0.054$ ) individually, suggesting that CCL20 expression was synergistically induced by a combination of these factors. In contrast to IL-8 and CCL20, TLR5 expression was not significantly altered by simvastatin (Figure 1E). The expression of this gene was significantly increased by *P. aeruginosa* ( $P=0.015$ ) but interestingly, under combined statin treatment and infection TLR5 expression levels were comparable to statin-treated uninfected cells, suggesting that simvastatin may reduce *P. aeruginosa*-mediated induction of TLR5.

### Novel induction of KLF6 alternative splicing by *P. aeruginosa* and simvastatin

While our results confirm *P. aeruginosa* induction of wtKLF6 expression [17], the expression of KLF6 splice variants in the context of bacterial infections has never been characterised. In addition, the impact of statins on KLF6 alternative splicing has yet to be investigated. Therefore, we sought to examine whether statins and *P. aeruginosa* could influence the alternative splicing of KLF6 in lung epithelial cells, using qRT-PCR (Figure 2). Simvastatin increased the expression of SV1 (Figure 2A), SV2 (Figure 2B) and SV3 (Figure 2C), with SV3 levels reaching significance ( $P=0.01$ ). *P. aeruginosa* induced the expression of all 3 KLF6 splice variants but to varying degrees. Of the 3 variants, SV3 was increased to the greatest extent ( $P=0.005$ ), and SV2 was also significantly induced ( $P=0.013$ ). SV1 displayed the lowest level of induction and this did not reach significance. As with wtKLF6, *P. aeruginosa* had a greater effect on the expression of all 3 splice variants than simvastatin. In the presence of simvastatin and *P. aeruginosa* combined, there was no significant alteration in SV1, SV2 and SV3 levels compared to those in untreated infected cells suggesting that statins and *P. aeruginosa* do not have a synergistic effect on KLF6 alternative splicing. Interestingly, the transcript levels of wtKLF6 (Figure 1B) were higher than those of SV1, SV2

and SV3 under all conditions, suggesting that wtKLF6 was the dominantly expressed variant in A549 cells and in response to simvastatin and *P. aeruginosa* infection.

### Elucidating the downstream effect of statin-mediated KLF6 induction

In order to further examine the influence and impact of the novel induction of KLF6 by simvastatin, stable wtKLF6 knock-down cell lines (designated si-wtKLF6) were generated by infecting A549 cells with pSUPER si-wtKLF6, or a control cell line using the pSUPER si-luc vector (designated si-luc). To verify that the si-wtKLF6 cells were displaying reduced expression of wtKLF6, they were harvested for RNA isolation and the expression of wtKLF6 was analysed using qRT-PCR. It was demonstrated that in the si-wtKLF6 cells, wtKLF6 expression was significantly reduced by 47.2% compared to the cells containing the vector control ( $P=0.008$ ) (Figure 3A).

To investigate the consequences of wtKLF6 knockdown in lung epithelial cells, expression analysis was carried out on four KLF6 regulatory target genes; ASAH1, CCL20, iNOS and PPAR $\gamma$ . In si-wtKLF6 cells, expression of 3 of the target genes was attenuated (Figure 3B). ASAH1, CCL20 and iNOS expression was decreased by an average of 30.3% (non-significant), 51.5% ( $P=0.012$ ) and 72.9% ( $P=0.047$ ) respectively in si-wtKLF6 cells compared to vector control cells. However, the expression of PPAR $\gamma$  was comparable between si-wtKLF6 and vector control cells, suggesting that the expression of PPAR $\gamma$  in our model was not dependent upon wtKLF6. This also suggests that KLF6 regulation of CCL20 was not dependent on PPAR $\gamma$ , although it may be possible that the level of wtKLF6 reduction obtained in si-cells may not be enough to inhibit PPAR $\gamma$  expression.

Thus, wtKLF6 plays a key, multifaceted regulatory role in lung epithelia and we sought to examine the effect of simvastatin on wtKLF6 and its 3 regulatory targets (ASAH1, CCL20 and iNOS) in si-wtKLF6 lung cells. This analysis was carried out using qRT-PCR of transcripts isolated from si-wtKLF6 and si-luc cells which had been treated with 10  $\mu$ M simvastatin for 24 hours. This analysis served the joint objectives of elucidating novel statin targets in the lung epithelial cells, and investigating the downstream effects of statin-mediated KLF6 induction.

Results demonstrated that simvastatin increased the expression of ASAH1 in si-luc control and si-wtKLF6 cells ( $P=0.04$ ) (Figure 3C). However, as its expression in statin-treated si-wtKLF6 cells was equivalent to that of statin treated si-luc control cells, the induction of ASAH1 by simvastatin did not appear to be mediated through wtKLF6. CCL20 expression analysis showed that the wtKLF6-dependent decrease in CCL20 that was observed in untreated si-wtKLF6 cells (Figure 3B) was maintained in vehicle-treated si-wtKLF6 cells ( $P=0.04$ ) (Figure 3D). However, in the presence of simvastatin CCL20 expression was decreased in vector control cells, implying that the vector may have had an effect on CCL20 expression under these conditions. Nevertheless, in si-wtKLF6 cells, the expression of CCL20 was equivalent between simvastatin-treated and DMSO-treated cells, suggesting that the novel simvastatin-mediated induction of CCL20 observed in A549 cells (Figure 1D) may be wtKLF6-dependent.

The third KLF6 target gene examined was iNOS. Interestingly, similarly to CCL20, simvastatin treatment reduced iNOS expression in si-luc control cells (Figure 3E). However, in si-wtKLF6 cells, this reduction was not observed, and expression was at an equivalent level to that of vector control cells. This latter observation suggests that simvastatin may inhibit iNOS expression in a KLF6-dependent mechanism.

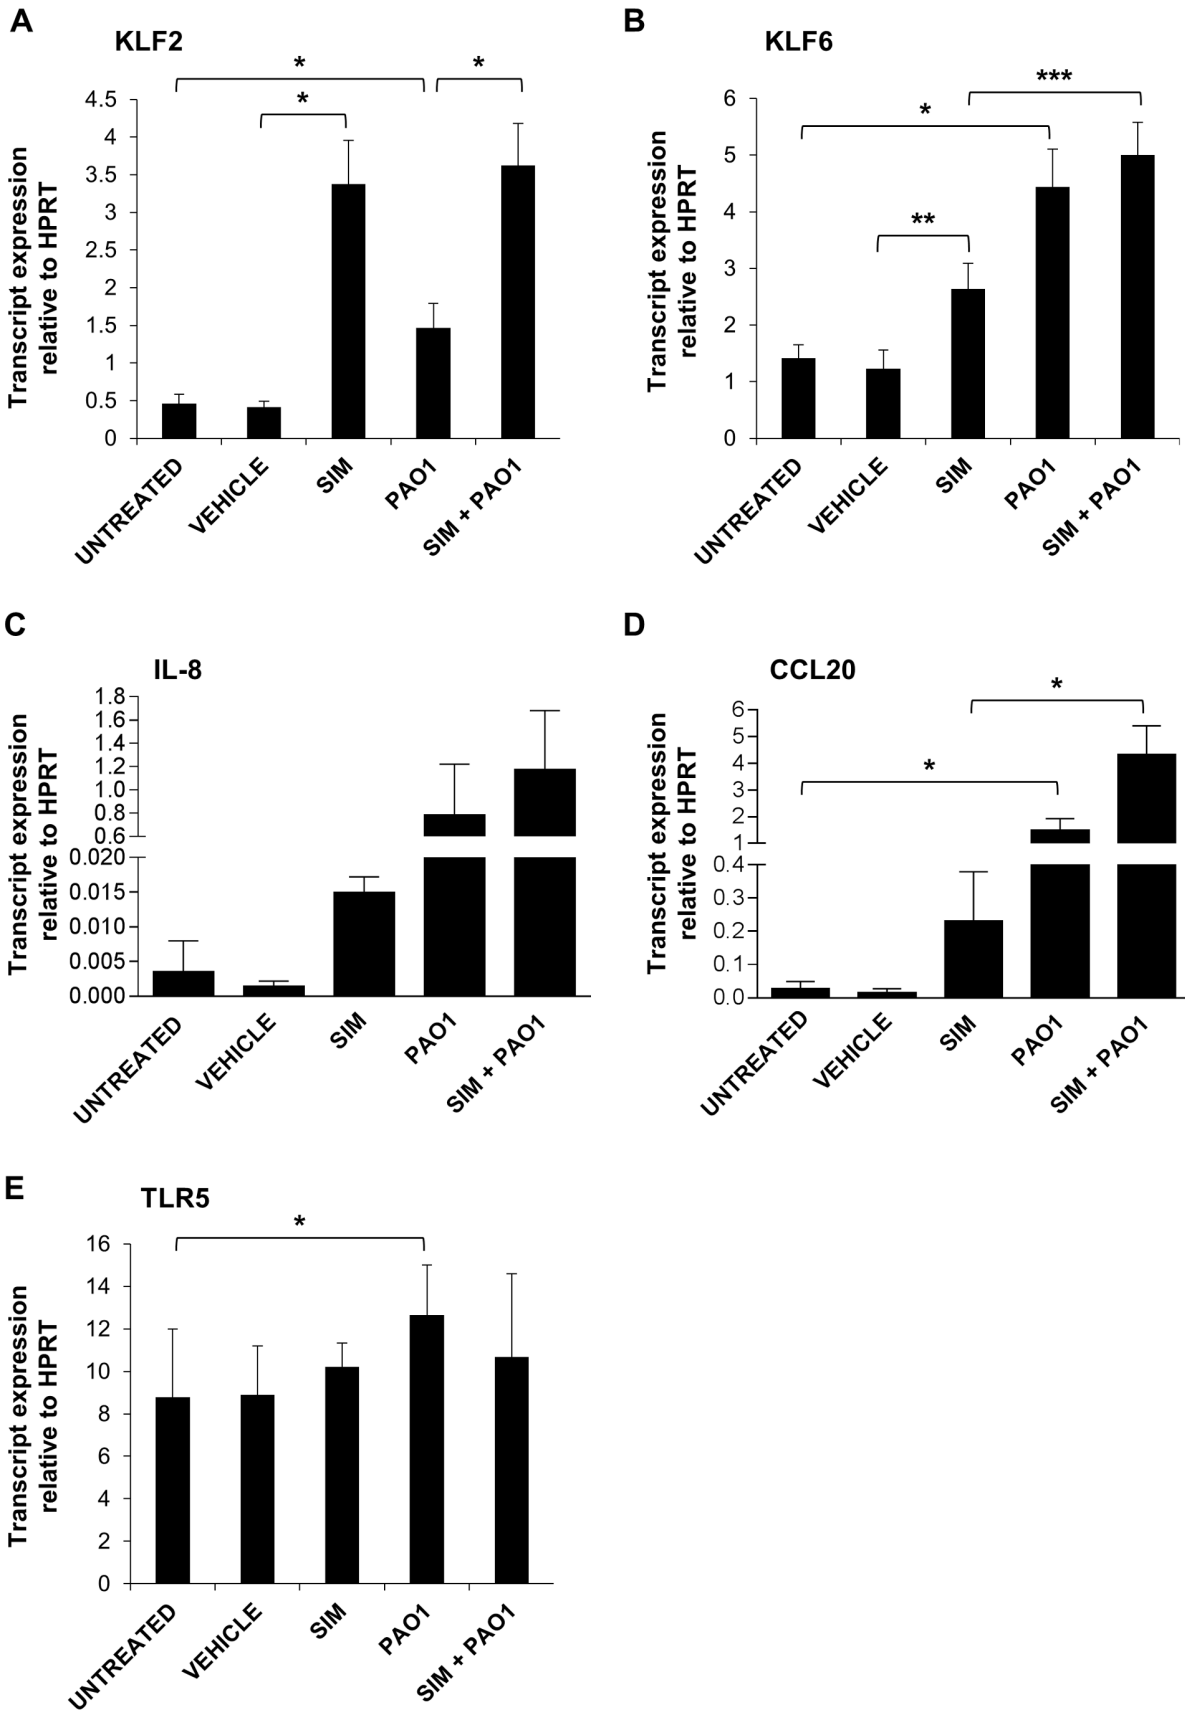

**Figure 1. Statin treatment and *P. aeruginosa* infection modulate the host immune response.** A549 cells were treated with 10  $\mu$ M simvastatin or an equivalent amount of DMSO (VEHICLE) for 24 hours. Untreated and statin-treated cells were subsequently infected with *P. aeruginosa* PAO1 for 3 hours at MOI 50:1. The expression of (A) KLF2 (B) KLF6 (C) IL-8 (D) CCL20 and (E) TLR5 was analysed in uninfected cells, and in the presence of vehicle, simvastatin (SIM), *P. aeruginosa* (PAO1) and simvastatin and PAO1 combined (SIM+PAO1). \**P*,  $\leq 0.05$ , \*\**P*,  $\leq 0.01$ , \*\*\**P*,  $\leq 0.001$ . doi:10.1371/journal.pone.0102200.g001

Cellular cytotoxicity and *P. aeruginosa* adhesion and invasion in response to simvastatin

Having established that simvastatin treatment can alter the expression of host immune-responsive genes, and having previously demonstrated the alteration of *in vitro* *P. aeruginosa* motility and early biofilm formation by statins [48], we investigated the effect of statins on *P. aeruginosa*-related cytotoxicity, adhesion and invasion of A549 epithelial cells. The cytotoxic effect of *P. aeruginosa* is exerted via its T3SS toxins, in particular ExoS [49]. ExoS in turn is required for *P. aeruginosa* induction of KLF6 [17]

suggesting that KLF6 induction may contribute to *P. aeruginosa*-initiated cell death. Furthermore, the induction of IL-8 and CCL20 has previously been linked to bacterial adhesion and invasion [50–52] and therefore statins may have a regulatory impact on these phenotypes. To examine the effect of statins on these physiological outcomes, A549 cells were treated with 10  $\mu$ M simvastatin for 24 hours and subsequently infected with *P. aeruginosa* PAO1.

Cytotoxicity was quantified by measuring lactate dehydrogenase (LDH) release from cells as a marker of tissue breakdown during

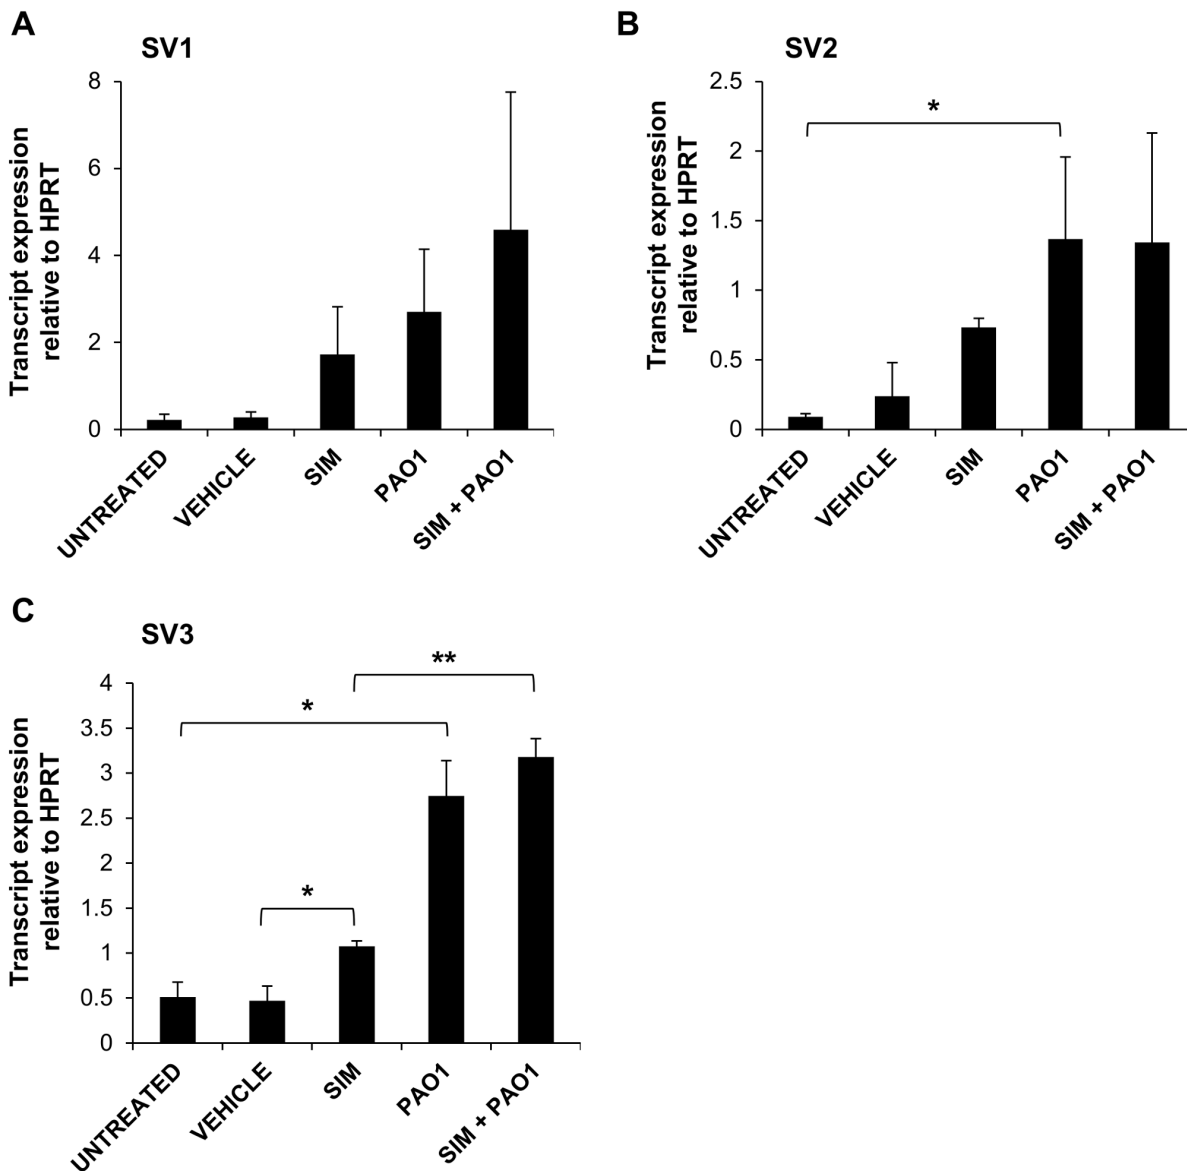

**Figure 2. Induction of KLF6 splice variants by simvastatin.** A549 cells were treated with 10  $\mu$ M simvastatin for 24 hours, following which they were infected with *P. aeruginosa* PAO1 for 3 hours at MOI 50:1. The expression of (A) SV1, (B) SV2 and (C) SV3 was examined using qRT-PCR. \**P*,  $\leq 0.05$ , \*\**P*,  $\leq 0.01$ . doi:10.1371/journal.pone.0102200.g002

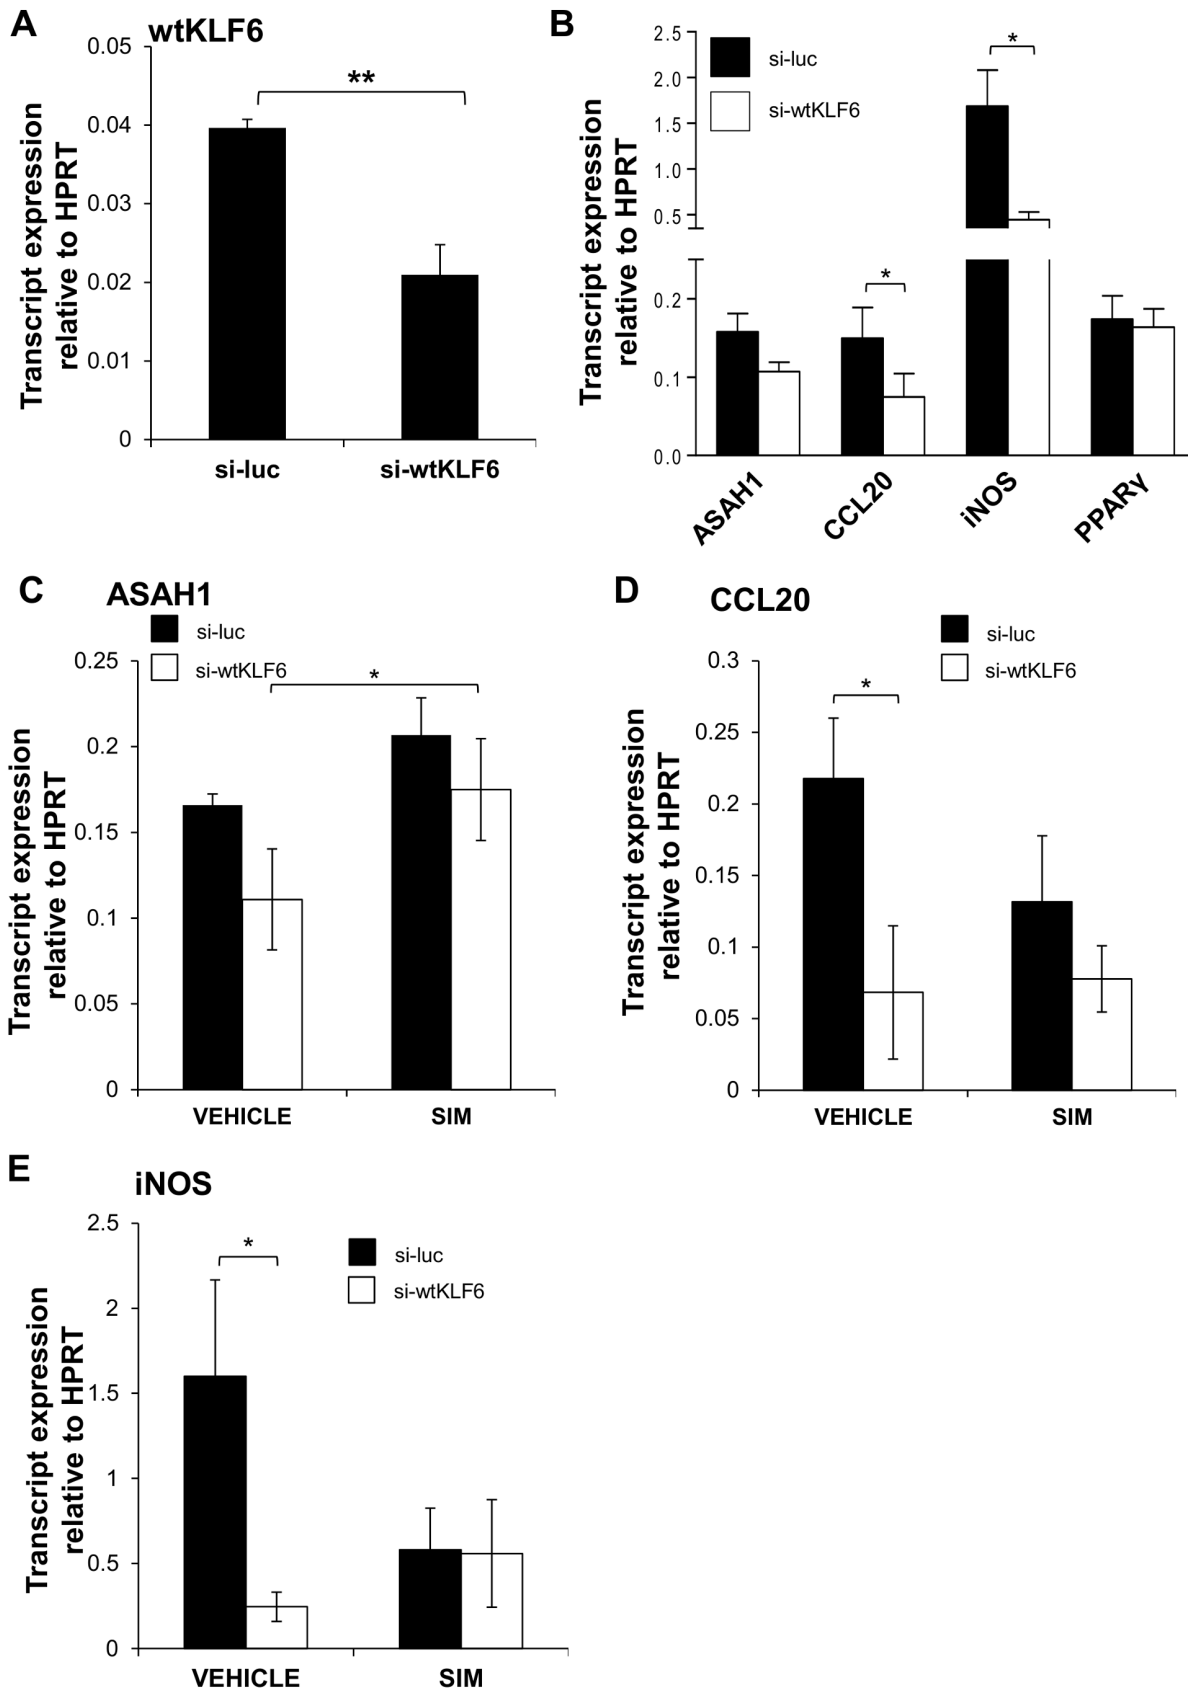

**Figure 3. wtKLF6 knockdown and statin effects in lung epithelial cells.** (A) wtKLF6 mRNA expression was reduced by 47.2% compared to vector control (si-luc) cells ( $P=0.008$ ). (B) Expression of the wtKLF6 target genes ASAH1, CCL20, iNOS and PPAR $\gamma$  was examined by qRT-PCR in si-wtKLF6 cells compared to vector control. ASAH1, CCL20 and iNOS were inhibited in si-cells compared to vector control cells. PPAR $\gamma$  was unaffected in

si-wtKLF6. **(C)** Simvastatin induced ASAHI expression but independent of wtKLF6. Simvastatin induced CCL20 **(D)** and reduced iNOS **(E)** expression and these appeared to be mediated via wtKLF6. \* $P, \leq 0.05$ , \*\*  $P, \leq 0.01$ . doi:10.1371/journal.pone.0102200.g003

statin treatment and *P. aeruginosa* infection (Figure 4A). Interestingly, at 6 hours post infection, we observed that simvastatin alone had a low but significant cytotoxic effect compared to untreated and DMSO treated cells respectively ( $P=0.018$ ,  $P=0.04$ ). While *P. aeruginosa* was significantly cytotoxic compared to untreated cells ( $P=0.027$ ) and statin-treated cells ( $P=0.044$ ), in simvastatin-treated cells *P. aeruginosa* infection was significantly more cytotoxic compared to untreated cells ( $P=0.0003$ ), vehicle-treated cells ( $P=0.0006$ ) and simvastatin-treated, uninfected cells ( $P=0.0005$ ). This sustained level of cytotoxicity between infected cells and

statin-treated infected cells suggested that the presence of simvastatin does not attenuate cell damage caused by *P. aeruginosa*. LDH release was also examined at earlier intervals (1.5 and 3 hours post infection), but a significant level of cytotoxicity was not observed at these times (data not shown).

The role of wtKLF6 in inhibiting cell proliferation and inducing apoptosis has been extensively established [25,26,53]. We thus investigated whether wtKLF6 played a role in the cytotoxic effects exerted by simvastatin on lung epithelial cells. si-wtKLF6 and vector control A549 cells were treated with either 10  $\mu\text{M}$

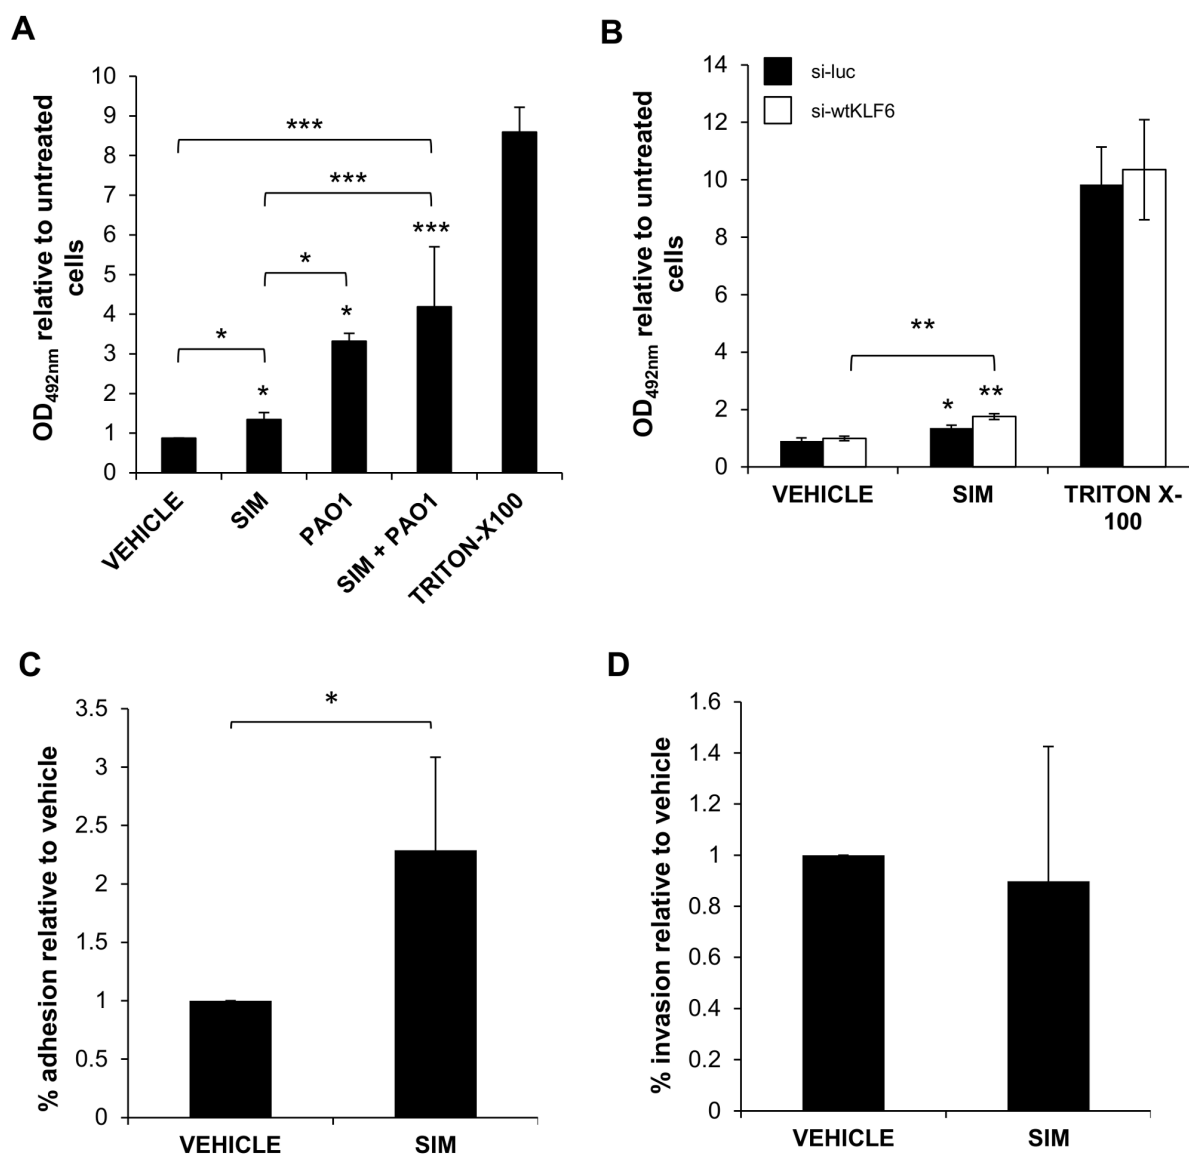

**Figure 4. Cellular cytotoxicity and *P. aeruginosa* adhesion and invasion in response to simvastatin treatment.** Cells were treated with 10  $\mu\text{M}$  simvastatin for 24 hours **(A, B, C)**, following which they were infected with *P. aeruginosa* PAO1 at MOI 50:1 **(A, C)**. **(A)** Simvastatin significantly induced cytotoxicity but did not alter *P. aeruginosa*-mediated LDH release at 6 hours post infection. **(B)** Simvastatin-induced cytotoxicity was not significantly altered in si-wtKLF6 knockdown cells demonstrating wtKLF6 was not implicated in simvastatin-mediated cytotoxicity of lung epithelial cells. **(C)** Simvastatin treatment increased *P. aeruginosa* adhesion to cells, but **(D)** did not influence invasion at 3 hours of infection. \* $P, \leq 0.05$ , \*\* $P, \leq 0.01$ , \*\*\* $P, \leq 0.001$ . doi:10.1371/journal.pone.0102200.g004



simvastatin or DMSO vehicle for 24 hours in serum-free medium, and cytotoxicity was quantified by measuring LDH release. In comparison to untreated cells, simvastatin caused a significant but comparable increase in LDH release in both vector control ( $P=0.04$ ), and si-wtKLF6 ( $P=0.005$ ) cells (Figure 4B). This demonstrated that wtKLF6 does not play a role in statin-mediated cytotoxicity and cell death, thus suggesting that wtKLF6-induced CCL20 and iNOS do not regulate these processes.

The effect of simvastatin on bacterial adhesion and invasion was also examined in A549 cells treated with 10  $\mu$ M simvastatin for 24 hours and subsequently infected with *P. aeruginosa* PAO1 for 3 hours. Simvastatin increased the adhesion of PAO1 to A549 cells compared to those treated with vehicle (Figure 4C), but, in contrast, statin treatment did not alter invasion of *P. aeruginosa* compared to vehicle-treated cells (Figure 4D).

## Discussion

In this study, we have demonstrated that simvastatin can modulate the expression of genes involved in the host response to *P. aeruginosa* infections in lung epithelial cells. A model for the mechanism behind these interactions is proposed in Figure 5. Previous studies have shown that attenuation of pro-inflammatory cytokine production is a key pleiotropic effect of statins in several tissue types (reviewed in [54] and [55]), including bronchial epithelial cells [56], while Kiener and colleagues showed that statins could increase monocytic pro-inflammatory cytokine and chemokine production in a mevalonate-dependent manner, thus sensitising them to challenge by inflammatory agents [15]. The latter of these studies correlates with our observation whereby simvastatin treatment induced IL-8 and CCL20 expression and that this was sustained and synergistically increased respectively upon infection with *P. aeruginosa*. The mechanism for this synergistic effect on CCL20 expression is unknown but we could hypothesise that it may be partly due to the increase in bacterial adhesion in the presence of simvastatin, as CCL20 expression in bacterial infections is linked to this phenotype [50]. However, *P. aeruginosa* adherence has also been linked to the induction of IL-8 [50], which was not synergistically induced in this study. Therefore, other factors are likely to be involved in the additive induction of CCL20 by *P. aeruginosa* and simvastatin. Furthermore, *P. aeruginosa*-mediated IL-8 and CCL20 production has been shown to be TLR5-dependent [43,52], but TLR5 does not appear to be involved in the simvastatin induction of these factors, as TLR5 expression was not altered by statin treatment. In this study, we also showed the novel alteration of ASAHI and iNOS expression in response to simvastatin treatment. The induction of ASAHI by simvastatin could potentially be beneficial, as it may decrease ceramide-mediated inflammation in people with CF and other inflammatory disorders. On the other hand, decreased iNOS expression in CF patients is associated with increased bacterial adherence [39], and the simvastatin-mediated reduction of iNOS expression that was observed in si-luc-transfected cells (Figure 3E) and untransfected A549 cells (data not shown) may potentially be responsible for the increased adhesion of *P. aeruginosa* in the presence of this compound.

Our results correlate with previous reports of statin induction of KLF2 [22,23] and we demonstrate that simvastatin had a significantly greater affinity for KLF2 induction than *P. aeruginosa*. This is possibly because statins have been shown to directly induce KLF2 expression by binding to a MEF2 transcription factor site in the *klf2* promoter region [22], while the induction of KLF2 by *P. aeruginosa* is proposed to be indirectly regulated by Type 3 toxin-mediated inhibition of host protein (RhoA) activity [17,57,58]. In

contrast to KLF2, KLF6 has not previously been shown to be induced by statins. Here we demonstrate for the first time that simvastatin did induce KLF6 in airway epithelial cells. Furthermore, as *in silico* prediction of binding sites in the KLF6 promoter region demonstrates that a putative MEF2A binding site is located 228 bp upstream of the *klf6* start site (data not shown), we propose that statins may induce *klf6* transcription in a similar manner to *klf2*. However, this does not account for the induction of KLF6 alternative splicing by statins. Production of KLF6 splice variants is regulated by a signalling cascade which involves the Rho GTPase Ras and the downstream Akt and PI3-K signalling proteins [28]. Previous studies have demonstrated that statins can modulate the phosphorylation and activation of the Akt signalling molecule in the Ras pathway [59,60], which may account for splice variant production by simvastatin. However, this may be balanced with the characteristic statin-mediated inhibition of Ras prenylation first described by Leonard *et al.* [61].

We also identified for the first time the induction of KLF6 alternative splicing by *P. aeruginosa*. Previously we reported that KLF6 is induced by *P. aeruginosa* T3SS toxins [17], and we propose that the induction of KLF6 splice variants by *P. aeruginosa* may be mediated through 2 T3SS-dependent mechanisms. Firstly, *P. aeruginosa* may induce KLF6 alternative splicing by modulating Ras signalling as the ExoS toxin of *P. aeruginosa* has been found to regulate activation of Ras signalling [62]. Furthermore, the *P. aeruginosa* T3SS also induces the production of reactive oxygen species (ROS) during infection [63] and these compounds can induce KLF6 alternative splicing [64]. It was interesting to note that wtKLF6 was the dominant KLF6 variant in A549 lung epithelial cells both at basal level and in response to *P. aeruginosa* infection, in spite of them being a cancer cell line. Previously, increased SV1 has been linked to various cancers including that of the lung. Nevertheless our results clearly demonstrate a role for wtKLF6 in modulating the host response to infection.

wtKLF6 was also found to regulate the statin effects on CCL20 and iNOS but not ASAHI in lung epithelial cells. Interestingly, our data showed that wtKLF6 did not appear to regulate the expression of PPAR $\gamma$  in lung cells as it did in kidney cells [40], suggesting that this interaction and subsequent CCL20 induction may be tissue-specific. The regulation of statin-mediated CCL20 and iNOS induction by wtKLF6 affirms the role of this protein in the immune response, and suggests that wtKLF6 has a role as a regulator of immune signalling. However, wtKLF6-dependent ASAHI expression suggests that, like statins, wtKLF6 may induce both pro- and anti-inflammatory responses, and may thus play a role in maintaining a balanced inflammatory response. Furthermore, KLF6 splice variants may also antagonise the pro-inflammatory effects of wtKLF6; SV1 has been found to have a negative regulatory effect on the pro-inflammatory cytokine TNF $\alpha$ , whereas wtKLF6 may induce this protein [64].

Statins have been proposed as novel therapeutics in the fight against infections [1,2], and this work demonstrates some potential effects simvastatin could have if used as an anti-microbial agent in respiratory infections. The manipulation of pro-inflammatory cytokines and KLFs by simvastatin may lead to improved survival and bacterial clearance mediated by IL-8 and CCL20, whereas statin-induced KLF2 may serve as a regulator to downplay other elements of the inflammatory response. The dominance of wtKLF6 compared to the other splice variants suggests that a general anti-proliferative effect is conferred on simvastatin-treated and *P. aeruginosa* infected cells. Further studies are needed to elucidate the mechanistic role of KLF6 splice variants in the *P. aeruginosa*-host response, and to determine whether statins influence the expression of downstream splice variant targets.

A

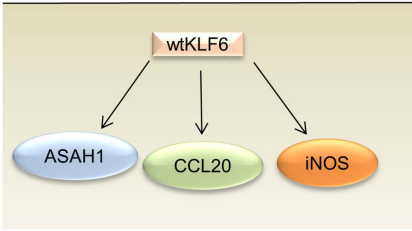

B

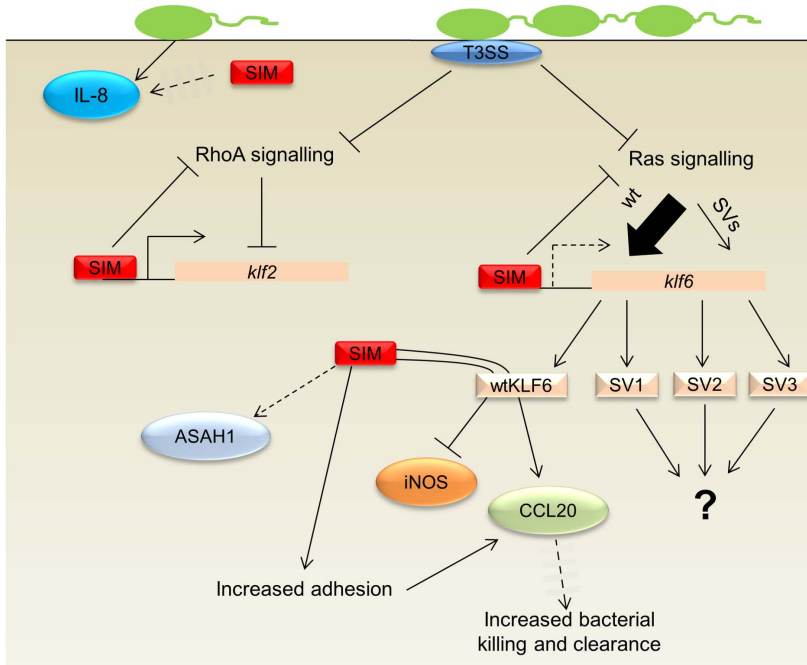

**Figure 5. A model for the findings observed in this study.** (A) In this work, wtKLF6 was found to regulate the expression of ASAHI, CCL20 and iNOS in lung cells in the absence of simvastatin (SIM). (B) SIM may induce KLF2 and KLF6 splice variant expression by binding to promoter elements and inhibition of Rho and Ras GTPase signalling. Rho and Ras GTPase signalling are also attenuated by the T3SS of *P. aeruginosa*, which may account for the induction of KLF2 and KLF6 by this species. The mechanism by which SIM induces IL-8 is unclear. However, the synergistic effect observed on CCL20 in this study may be a result of increased bacterial adhesion by SIM, and induction via wtKLF6. In addition, the wtKLF6-dependent reduction of iNOS by SIM may potentially be responsible for the observed increase in bacterial adhesion, Broken arrows represent mechanisms which require further elucidation.

doi:10.1371/journal.pone.0102200.g005

**Acknowledgments**

We would like to thank Pat Higgins and Maurice O’Donoghue for technical assistance, and David Woods for insightful discussion.

**Author Contributions**

Conceived and designed the experiments: FOG EH CA MJM CL JAM. Performed the experiments: EH JOC OCV SCC. Analyzed the data: EH MJM CL CA. Contributed reagents/materials/analysis tools: JAM FOG SCC. Wrote the paper: EH CA OCV FOG.

**References**

- Mermis JD, Simpson SQ (2012) HMG-CoA reductase inhibitors for prevention and treatment of severe sepsis. *Curr Infect Dis Rep* 14: 484–492. doi:10.1007/s11908-012-0277-1.
- Kouroumichakis I, Papanas N, Proikaki S, Zarogoulidis P, Maltezos E (2011) Statins in prevention and treatment of severe sepsis and septic shock. *Eur J Intern Med* 22: 125–133. doi:10.1016/j.ejim.2010.12.004.
- Dulak J, Józkwicz A (2005) Anti-angiogenic and anti-inflammatory effects of statins: relevance to anti-cancer therapy. *Curr Cancer Drug Targets* 5: 579–594.
- Almog Y, Shefer A, Novack V, Maimon N, Barski L, et al. (2004) Prior statin therapy is associated with a decreased rate of severe sepsis. *Circulation* 110: 880–885. doi:10.1161/01.CIR.0000138932.17956.F1 01.CIR.0000138932.17956.F1 [pii].
- Schlienger RG, Fedson DS, Jick SS, Jick H, Meier CR (2007) Statins and the risk of pneumonia: a population-based, nested case-control study. *Pharmacotherapy* 27: 325–332. doi:10.1592/phco.27.3.325.
- Chalmers JD, Singanayagam A, Murray MP, Hill AT (2008) Prior statin use is associated with improved outcomes in community-acquired pneumonia. *Am J Med* 121: 1002–1007.e1. doi:10.1016/j.amjmed.2008.06.030.
- Jouneau S, Bonizec M, Belleguic C, Desruets B, Brinchault G, et al. (2011) Anti-inflammatory effect of fluvastatin on IL-8 production induced by *Pseudomonas aeruginosa* and *Aspergillus fumigatus* antigens in cystic fibrosis. *PLoS One* 6: e22655. doi:10.1371/journal.pone.0022655.
- Kim T-G, Byamba D, Wu WH, Lee M-G (2011) Statins inhibit chemotactic interaction between CCL20 and CCR6 in vitro: possible relevance to psoriasis treatment. *Exp Dermatol* 20: 855–857. doi:10.1111/j.1600-0625.2011.01343.x.

9. Hernández-Perera O, Pérez-Sala D, Navarro-Antolín J, Sánchez-Pascuala R, Hernández G, et al. (1998) Effects of the 3-hydroxy-3-methylglutaryl-CoA reductase inhibitors, atorvastatin and simvastatin, on the expression of endothelin-1 and endothelial nitric oxide synthase in vascular endothelial cells. *J Clin Invest* 101: 2711–2719. doi:10.1172/JCI1500.
10. Masamura K, Oida K, Kanehara H, Suzuki J, Horie S, et al. (2003) Pitavastatin-induced thrombomodulin expression by endothelial cells acts via inhibition of small G proteins of the Rho family. *Arter Thromb Vasc Biol* 23: 512–517. doi:10.1161/01.ATV.0000060461.64771.F0 01.ATV.0000060461.64771.F0 [pii].
11. Law RE, Stimmel JB, Damore MA, Carter C, Clarke S, et al. (1992) Lipopolysaccharide-induced NF-kappa B activation in mouse 70Z/3 pre-B lymphocytes is inhibited by mevinolin and 5'-methylthioadenosine: roles of protein isoprenylation and carboxyl methylation reactions. *Mol Cell Biol* 12: 103–111.
12. Parihar SP, Guler R, Lang DM, Suzuki H, Marais AD, et al. (2013) Simvastatin Enhances Protection against *Listeria monocytogenes* Infection in Mice by Counteracting *Listeria*-Induced Phagosomal Escape. *PLoS One* 8: e75490. doi:10.1371/journal.pone.0075490.
13. Coward WR, Marci A, Yang A, Vasa-Nicotera MM, Chow SC (2006) Statin-induced proinflammatory response in mitogen-activated peripheral blood mononuclear cells through the activation of caspase-1 and IL-18 secretion in monocytes. *J Immunol* 176: 5284–5292.
14. Erkkila L, Jauhainen M, Laitinen K, Haasio K, Tiirola T, et al. (2005) Effect of simvastatin, an established lipid-lowering drug, on pulmonary *Chlamydia pneumoniae* infection in mice. *Antimicrob Agents Chemother* 49: 3959–3962. doi:10.1128/AAC.49.9.3959-3962.2005.
15. Kiener PA, Davis PM, Murray JL, Youssef S, Rankin BM, et al. (2001) Stimulation of inflammatory responses in vitro and in vivo by lipophilic HMG-CoA reductase inhibitors. *Int Immunopharmacol* 1: 105–118. doi:10.1016/S0162-3109(00)00272-1.
16. Bieker JJ (2001) Kruppel-like factors: three fingers in many pies. *J Biol Chem* 276: 34355–34358. doi:10.1074/jbc.R100043200 R100043200 [pii].
17. O'Grady EP, Mulcahy H, O'Callaghan J, Adams C, O'Gara F (2006) *Pseudomonas aeruginosa* infection of airway epithelial cells modulates expression of Kruppel-like factors 2 and 6 via RsmA-mediated regulation of type III exoenzymes S and Y. *Infect Immun* 74: 5893–5902. doi:10.1128/IAI.00489-06.
18. Das H, Kumar A, Lin Z, Patino WD, Hwang PM, et al. (2006) Kruppel-like factor 2 (KLF2) regulates proinflammatory activation of monocytes. *Proc Natl Acad Sci U S A* 103: 6653–6658. doi:10.1073/pnas.0508235103 [pii] 10.1073/pnas.0508235103.
19. Mahabeshwar GH, Kawanami D, Sharma N, Takami Y, Zhou G, et al. (2011) The myeloid transcription factor KLF2 regulates the host response to polymicrobial infection and endotoxic shock. *Immunity* 34: 715–728. doi:10.1016/j.immuni.2011.04.014.
20. Moreillon C, Gras D, Hologne C, Bajolet O, Cottrez F, et al. (2005) Live *Staphylococcus aureus* and bacterial soluble factors induce different transcriptional responses in human airway cells. *Physiol Genomics* 20: 244–255. doi:10.1152/physiolgenomics.00135.2004.
21. Sauvonnet N, Pradet-Balade B, Garcia-Sanz JA, Cornelis GR (2002) Regulation of mRNA expression in macrophages after *Yersinia enterocolitica* infection. Role of different Yop effectors. *J Biol Chem* 277: 25133–25142. doi:10.1074/jbc.M203239200 M203239200 [pii].
22. Sen-Banerjee S, Mir S, Lin Z, Hamik A, Atkins GB, et al. (2005) Kruppel-like factor 2 as a novel mediator of statin effects in endothelial cells. *Circulation* 112: 720–726. doi:10.1161/CIRCULATIONAHA.104.525774 [pii] 10.1161/CIRCULATIONAHA.104.525774.
23. Tuomisto TT, Lumivuori H, Kansanen E, Hakkinen SK, Turunen MP, et al. (2008) Simvastatin has an anti-inflammatory effect on macrophages via upregulation of an atheroprotective transcription factor, Kruppel-like factor 2. *Cardiovasc Res* 78: 175–184. doi:10.1093/cvr/cvn007 [pii] 10.1093/cvr/cvn007.
24. Narla G, Heath KE, Reeves HL, Li D, Giono LE, et al. (2001) KLF6, a candidate tumor suppressor gene mutated in prostate cancer. *Science* 294: 2563–2566. doi:10.1126/science.1066326 294/5551/2563 [pii].
25. Ito G, Uchiyama M, Kondo M, Mori S, Usami N, et al. (2004) Kruppel-like factor 6 is frequently down-regulated and induces apoptosis in non-small cell lung cancer cells. *Cancer Res* 64: 3838–3843. doi:10.1158/0008-5472.CAN-04-0185.
26. Narla G, DiFeo A, Reeves HL, Schaid DJ, Hirshfeld J, et al. (2005) A germline DNA polymorphism enhances alternative splicing of the KLF6 tumor suppressor gene and is associated with increased prostate cancer risk. *Cancer Res* 65: 1213–1222. doi:10.1158/0008-5472.CAN-04-4249.
27. DiFeo A, Feld L, Rodriguez E, Wang C, Beer DG, et al. (2008) A functional role for KLF6-SV1 in lung adenocarcinoma prognosis and chemotherapy response. *Cancer Res* 68: 965–970. doi:10.1158/0008-5472.CAN-07-2604.
28. Yea S, Narla G, Zhao X, Garg R, Tal-Kremer S, et al. (2008) Ras promotes growth by alternative splicing-mediated inactivation of the KLF6 tumor suppressor in hepatocellular carcinoma. *Gastroenterology* 134: 1521–1531. doi:10.1053/j.gastro.2008.02.015.
29. DiFeo A, Narla G, Hirshfeld J, Camacho-Vanegas O, Narla J, et al. (2006) Roles of KLF6 and KLF6-SV1 in ovarian cancer progression and intraperitoneal dissemination. *Clin Cancer Res* 12: 3730–3739. doi:10.1158/1078-0432.CCR-06-0054.
30. DiFeo A, Martignetti JA, Narla G (2009) The role of KLF6 and its splice variants in cancer therapy. *Drug Resist Updat* 12: 1–7. doi:10.1016/j.drug.2008.11.001.
31. Vetter D, Cohen-Naftaly M, Villanueva A, Lee YA, Kocabayoglu P, et al. (2012) Enhanced hepatocarcinogenesis in mouse models and human hepatocellular carcinoma by coordinate KLF6 depletion and increased messenger RNA splicing. *Hepatology* 56: 1361–1370. doi:10.1002/hep.25810.
32. Mgbemena V, Segovia J, Chang T-H, Bose S (2013) KLF6 and iNOS regulates apoptosis during respiratory syncytial virus infection. *Cell Immunol* 283: 1–7. doi:10.1016/j.cellimm.2013.06.002.
33. Mgbemena V, Segovia JA, Chang T-H, Tsai S-Y, Cole GT, et al. (2012) Transactivation of inducible nitric oxide synthase gene by Kruppel-like factor 6 regulates apoptosis during influenza A virus infection. *J Immunol* 189: 606–615. doi:10.4049/jimmunol.1102742.
34. Park JH, Elyahu E, Narla G, DiFeo A, Martignetti JA, et al. (2005) KLF6 is one transcription factor involved in regulating acid ceramidase gene expression. *Biochim Biophys Acta* 1732: 82–87. doi:10.1016/j.bbexp.2006.01.002.
35. Warke VG, Nambiar MP, Krishnan S, Tenbrock K, Geller DA, et al. (2003) Transcriptional activation of the human inducible nitric-oxide synthase promoter by Kruppel-like factor 6. *J Biol Chem* 278: 14812–14819. doi:10.1074/jbc.M300787200.
36. Grassme H, Jendrossek V, Riehle A, von Kurthy G, Berger J, et al. (2003) Host defense against *Pseudomonas aeruginosa* requires ceramide-rich membrane rafts. *Nat Med* 9: 322–330. doi:10.1038/nm823 nm823 [pii].
37. Teichgraber V, Ulrich M, Endlich N, Riethmuller J, Wilker B, et al. (2008) Ceramide accumulation mediates inflammation, cell death and infection susceptibility in cystic fibrosis. *Nat Med* 14: 382–391. doi:10.1038/nm1748.
38. Bove PF, van der Vliet A (2006) Nitric oxide and reactive nitrogen species in airway epithelial signaling and inflammation. *Free Radic Biol Med* 41: 515–527. doi:10.1016/j.freeradbiomed.2006.05.011.
39. Darling KEA, Evans TJ (2003) Effects of nitric oxide on *Pseudomonas aeruginosa* infection of epithelial cells from a human respiratory cell line derived from a patient with cystic fibrosis. *Infect Immun* 71: 2341–2349.
40. Qi W, Holian J, Tan CYR, Kelly DJ, Chen X-M, et al. (2011) The roles of Kruppel-like factor 6 and peroxisome proliferator-activated receptor- $\gamma$  in the regulation of macrophage inflammatory protein-3 $\alpha$  at early onset of diabetes. *Int J Biochem Cell Biol* 43: 383–392. doi:10.1016/j.biocel.2010.11.008.
41. Massion PP, Inoue H, Richman-Eisenstat J, Grunberger D, Jorens PG, et al. (1994) Novel *Pseudomonas* product stimulates interleukin-8 production in airway epithelial cells *in vitro*. *J Clin Invest* 93: 26–32. doi:10.1172/JCI116954.
42. Lin T, Maher L, Gomi K (2003) Selective early production of CCL20, or macrophage inflammatory protein 3 $\alpha$ , by human mast cells in response to *Pseudomonas aeruginosa*. *Infect Immun* 71: 365–373. doi:10.1128/IAI.71.1.365.
43. Zhang J, Xu K, Ambati B, Yu F-SX (2003) Toll-like receptor 5-mediated corneal epithelial inflammatory responses to *Pseudomonas aeruginosa* flagellin. *Invest Ophthalmol Vis Sci* 44: 4247–4254.
44. Hayashi F, Smith KD, Ozinsky A, Hawn TR, Yi EC, et al. (2001) The innate immune response to bacterial flagellin is mediated by Toll-like receptor 5. *Nature* 410: 1099–1103. doi:10.1038/35074106.
45. Gewirtz AT, Navas TA, Lyons S, Godowski PJ, Madara JL (2001) Cutting edge: bacterial flagellin activates basolaterally expressed TLR5 to induce epithelial proinflammatory gene expression. *J Immunol* 167: 1882–1885.
46. Narla G, DiFeo A, Yao S, Banno A, Hod E, et al. (2005) Targeted inhibition of the KLF6 splice variant, KLF6 SV1, suppresses prostate cancer cell growth and spread. *Cancer Res* 65: 5761–5768. doi:10.1158/0008-5472.CAN-05-0217.
47. Burns JL, Jonas M, Chi EY, Clark DK, Berger A, et al. (1996) Invasion of respiratory epithelial cells by *Burkholderia (Pseudomonas) cepacia*. *Infect Immun* 64: 4054–4059.
48. Hennessy E, Mooij MJ, Legendre C, Reen FJ, O'Callaghan J, et al. (2013) Statins inhibit *in vitro* virulence phenotypes of *Pseudomonas aeruginosa*. *J Antibiot (Tokyo)* 66: 99–101. doi:10.1038/ja.2012.95.
49. Lee VT, Smith RS, Tümmmler B, Lory S (2005) Activities of *Pseudomonas aeruginosa* effectors secreted by the Type III secretion system *in vitro* and during infection. *Infect Immun* 73: 1695–1705. doi:10.1128/IAI.73.3.1695-1705.2005.
50. Edwards LA, Bajaj-Elliott M, Klein NJ, Murch SH, Phillips AD (2011) Bacterial-epithelial contact is a key determinant of host innate immune responses to enteropathogenic and enteroaggregative *Escherichia coli*. *PLoS One* 6: e27030. doi:10.1371/journal.pone.0027030.
51. Khan MA, Bouzari S, Ma C, Rosenberger CM, Bergstrom KSB, et al. (2008) Flagellin-dependent and -independent inflammatory responses following infection by enteropathogenic *Escherichia coli* and *Citrobacter rodentium*. *Infect Immun* 76: 1410–1422. doi:10.1128/IAI.01141-07.
52. Parker D, Prince A (2013) Epithelial uptake of flagella initiates proinflammatory signaling. *PLoS One* 8: e59932. doi:10.1371/journal.pone.0059932.
53. Kremer-Tal S, Narla G, Chen Y, Hod E, DiFeo A, et al. (2007) Downregulation of KLF6 is an early event in hepatocarcinogenesis, and stimulates proliferation while reducing differentiation. *J Hepatol* 46: 645–654. doi:10.1016/j.jhep.2006.10.012.
54. Quist-Paulsen P (2010) Statins and inflammation: an update. *Curr Opin Cardiol* 25: 399–405. doi:10.1097/HCO.0b013e3283398e53.

55. Jain MK, Ridker PM (2005) Anti-inflammatory effects of statins: clinical evidence and basic mechanisms. *Nat Rev Drug Discov* 4: 977–987. doi:10.1038/nrd1901.
56. Iwata A, Shirai R, Ishii H, Kushima H, Otani S, et al. (2012) Inhibitory effect of statins on inflammatory cytokine production from human bronchial epithelial cells. *Clin Exp Immunol* 168: 234–240. doi:10.1111/j.1365-2249.2012.04564.x.
57. Dach K, Zovko J, Hogardt M, Koch I, van Erp K, et al. (2009) Bacterial toxins induce sustained mRNA expression of the silencing transcription factor klf2 via inactivation of RhoA and RhoGTPase 1. *Infect Immun* 77: 5583–5592. doi:10.1128/IAI.00121-09 [pii] 10.1128/IAI.00121-09.
58. O'Grady E, Mulcahy H, Adams C, Morrissey JP, O'Gara F (2007) Manipulation of host Kruppel-like factor (KLF) function by exotoxins from diverse bacterial pathogens. *Nat Rev Microbiol* 5: 337–341. doi:nrmicro1641 [pii] 10.1038/nrmicro1641.
59. Li C-B, Li X-X, Chen Y-G, Gao H-Q, Bao M-C, et al. (2012) Simvastatin exerts cardioprotective effects and inhibits the activity of Rho-associated protein kinase in rats with metabolic syndrome. *Clin Exp Pharmacol Physiol* 39: 759–764. doi:10.1111/j.1440-1681.2012.05730.x.
60. Matsuda N, Hayashi Y, Takahashi Y, Hattori Y (2006) Phosphorylation of endothelial nitric-oxide synthase is diminished in mesenteric arteries from septic rabbits depending on the altered phosphatidylinositol 3-kinase/Akt pathway: reversal effect of fluvastatin therapy. *J Pharmacol Exp Ther* 319: 1348–1354. doi:10.1124/jpet.106.109785.
61. Leonard S, Beck L, Sinensky M (1990) Inhibition of isoprenoid biosynthesis and the post-translational modification of pro-p21. *J Biol Chem* 265: 5157–5160.
62. McGuffie EM, Frank DW, Vincent TS, Olson JC (1998) Modification of Ras in eukaryotic cells by *Pseudomonas aeruginosa* exoenzyme S. *Infect Immun* 66: 2607–2613.
63. Jendrossek V, Grassmé H, Mueller I, Lang F, Gulbins E (2001) *Pseudomonas aeruginosa*-induced apoptosis involves mitochondria and stress-activated protein kinases. *Infect Immun* 69: 2675–2683. doi:10.1128/IAI.69.4.2675-2683.2001.
64. Urtasun R, Cubero FJ, Nieto N (2012) Oxidative stress modulates KLF6Full and its splice variants. *Alcohol Clin Exp Res* 36: 1851–1862. doi:10.1111/j.1530-0277.2012.01798.x.
65. Holloway BW, Krishnapillai V, Morgan AF (1979) Chromosomal genetics of *Pseudomonas*. *Microbiol Rev* 43: 73–102.
